# Supplementary material for: Self-formed C-dot-based 2D polysiloxane with high photoluminescence quantum yield and stability
Source: Royal Society of Chemistry journal article supplement (doi:10.1039/d0nr00743a), 2020-01-01
Supplement: d0nr00743a1.pdf [file d0nr00743a1.pdf]

## Supporting Information

### Self-formed C-Dots-Based 2D Polysiloxane with High Photoluminescence Quantum Yield and Stability

Guangqi Hu<sup>1,2</sup>, Xiaokai Xu<sup>2</sup>, Bingfu Lei<sup>2</sup>, Jianle Zhuang<sup>2</sup>, Xuejie Zhang<sup>2</sup>, Haoran Zhang<sup>2</sup>, Chaofan Hu<sup>2</sup>, Xiaotang Liu<sup>2\*</sup>, Yingji He<sup>1\*</sup>, Yingliang Liu<sup>2\*</sup>

1\* School of Photoelectric Engineering, Guangdong Polytechnic Normal University, Guangzhou 510665, China

2\* College of Materials and Energy, South China Agricultural University, Guangzhou 510642, China

\*Email: [tliuyl@scau.edu.cn](mailto:tliuyl@scau.edu.cn).

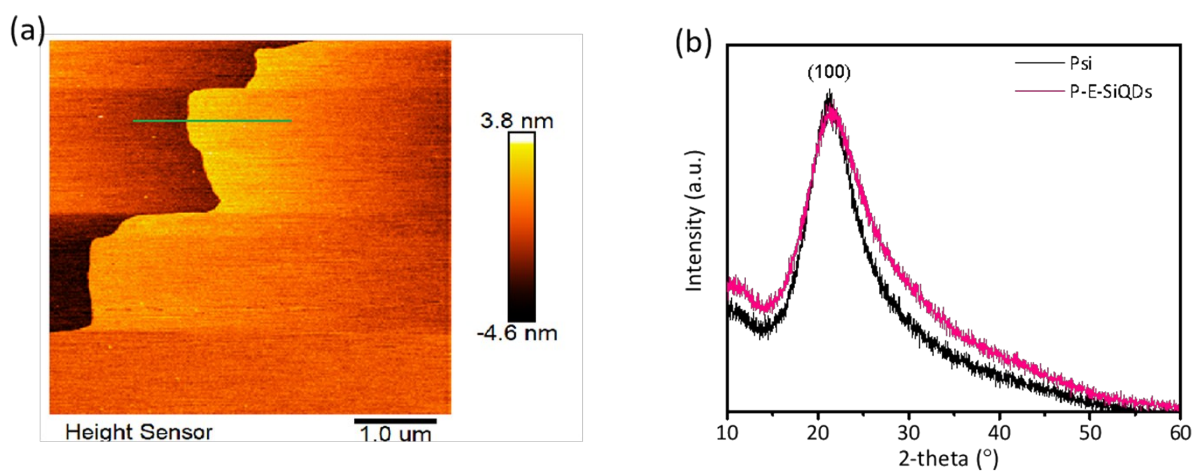

**Figure S1.** (a) The representative AFM image of quasi-2-dimensional dual-fluorescence P-E-Si-CDs. (b) XRD patterns of Psi and dual-fluorescence P-E-Si-CDs.

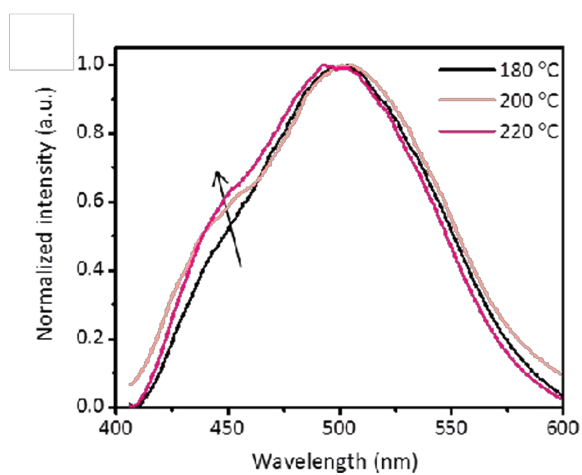

**Figure S2.** The fluorescence spectra of P-E-Si-CDs synthesized at different temperature under 395 nm excitation.

**Table S1.** Fitting results of the afterglow lifetimes of the P-E-Si-CDs at 440 nm and 515 nm under 395 nm excitation.

| Emission(nm) | t1(ns) | B1(%) | t2(ns) | B2(%) | t <sub>avg</sub> (ns) |
|--------------|--------|-------|--------|-------|-----------------------|
| 440          | 2.20   | 40.62 | 1.63   | 59.38 | 1.86                  |
| 515          | 7.04   | 27.37 | 2.81   | 72.63 | 3.97                  |

**Table S2.** EDS-analysed element contents of C, N, O, S in Psi and dual-fluorescence P-E-Si-CDs.

| Elements | Psi   | P-E-Si-CDs |
|----------|-------|------------|
| C        | 43.98 | 56.36      |
| N        | 18.54 | 7.93       |
| O        | 24.98 | 23.48      |
| Si       | 12.50 | 12.23      |

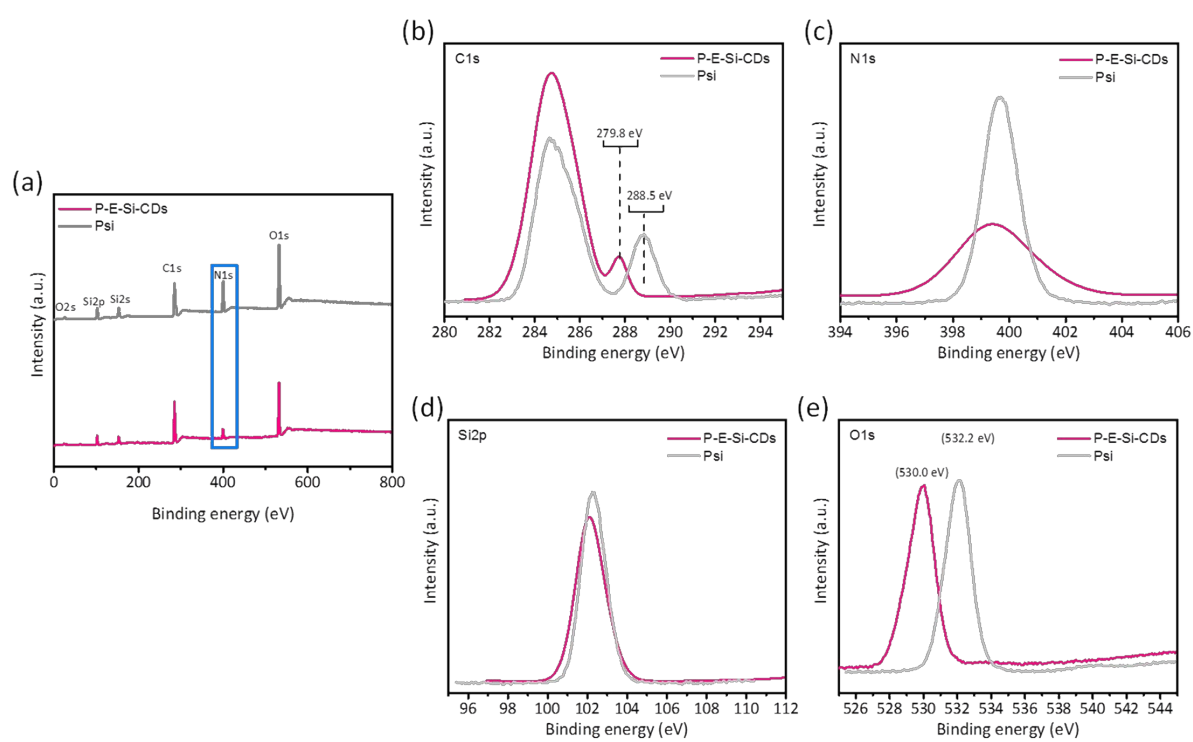

**Figure S3.** (a) XPS spectra, High-resolution XPS (b) C1s, (c) N1s, (d) Si2p and (f) O1s spectra of Psi and dual-fluorescence P-E-Si-CDs.

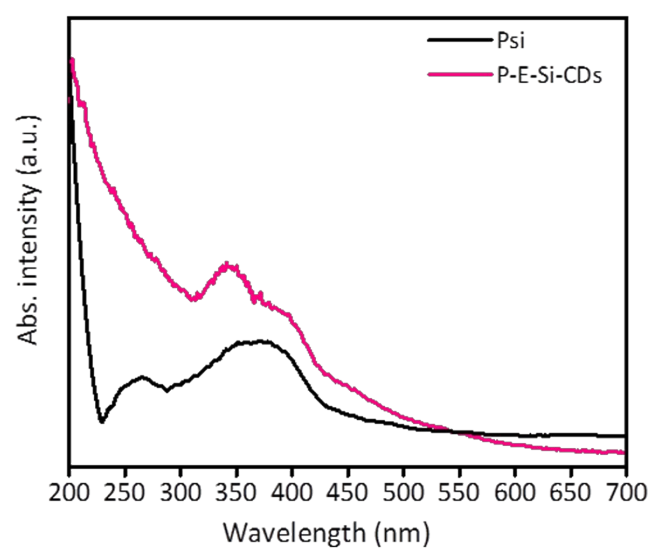

**Figure S4.** UV-Vis absorption spectra of Psi and dual-fluorescence P-E-Si-CDs.

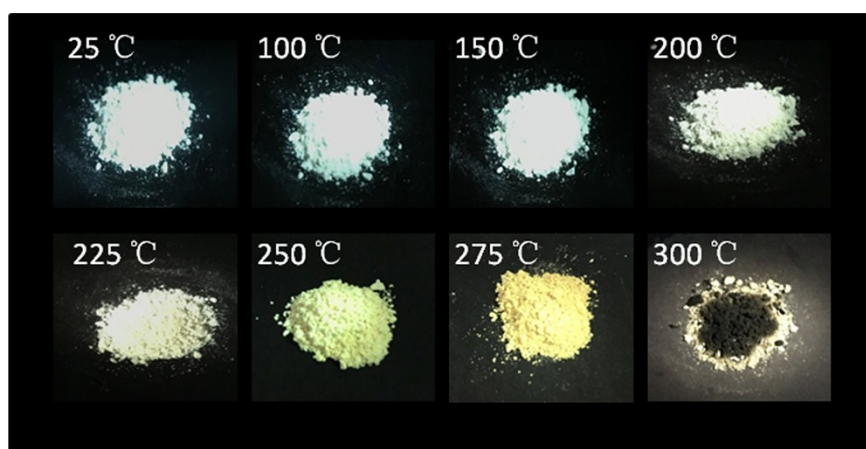

**Figure S5.** The fluorescence photographs under the varying treated temperature.



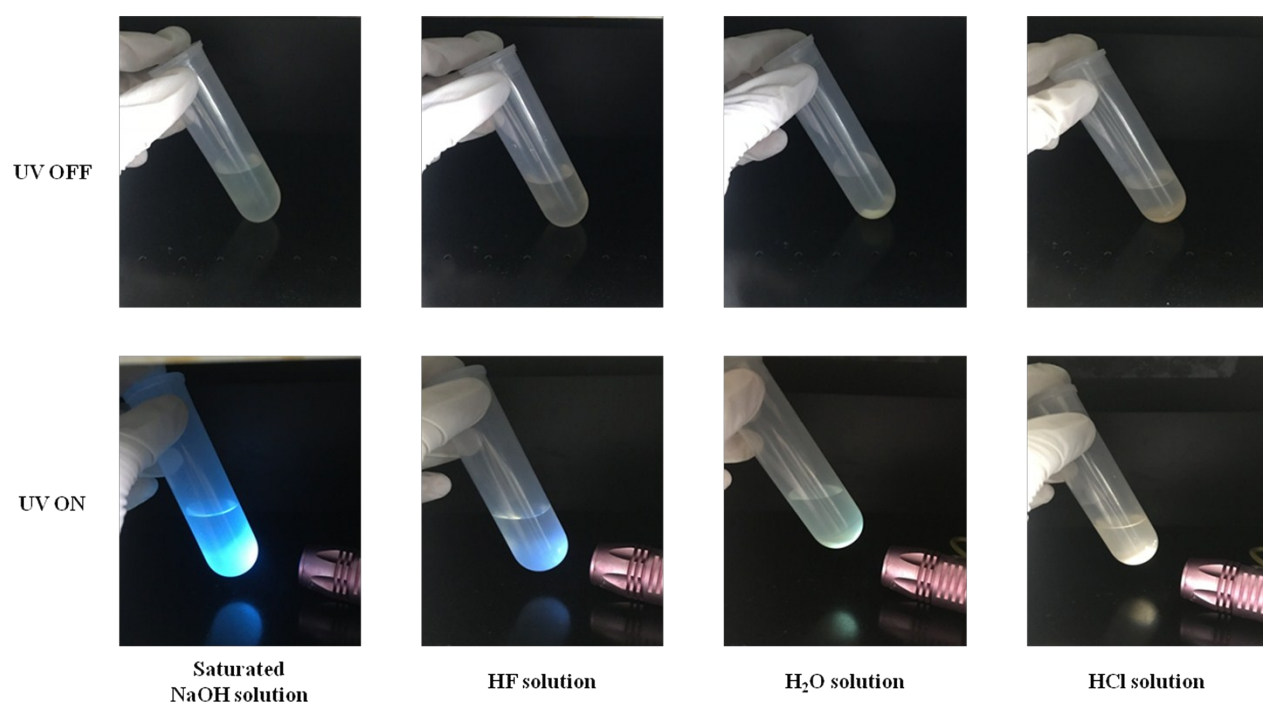

**Figure S6.** Photographs of P-E-Si-CDs in saturated NaOH solution, HF solution, water and concentrated HCl (37%) under UV irradiation or not.

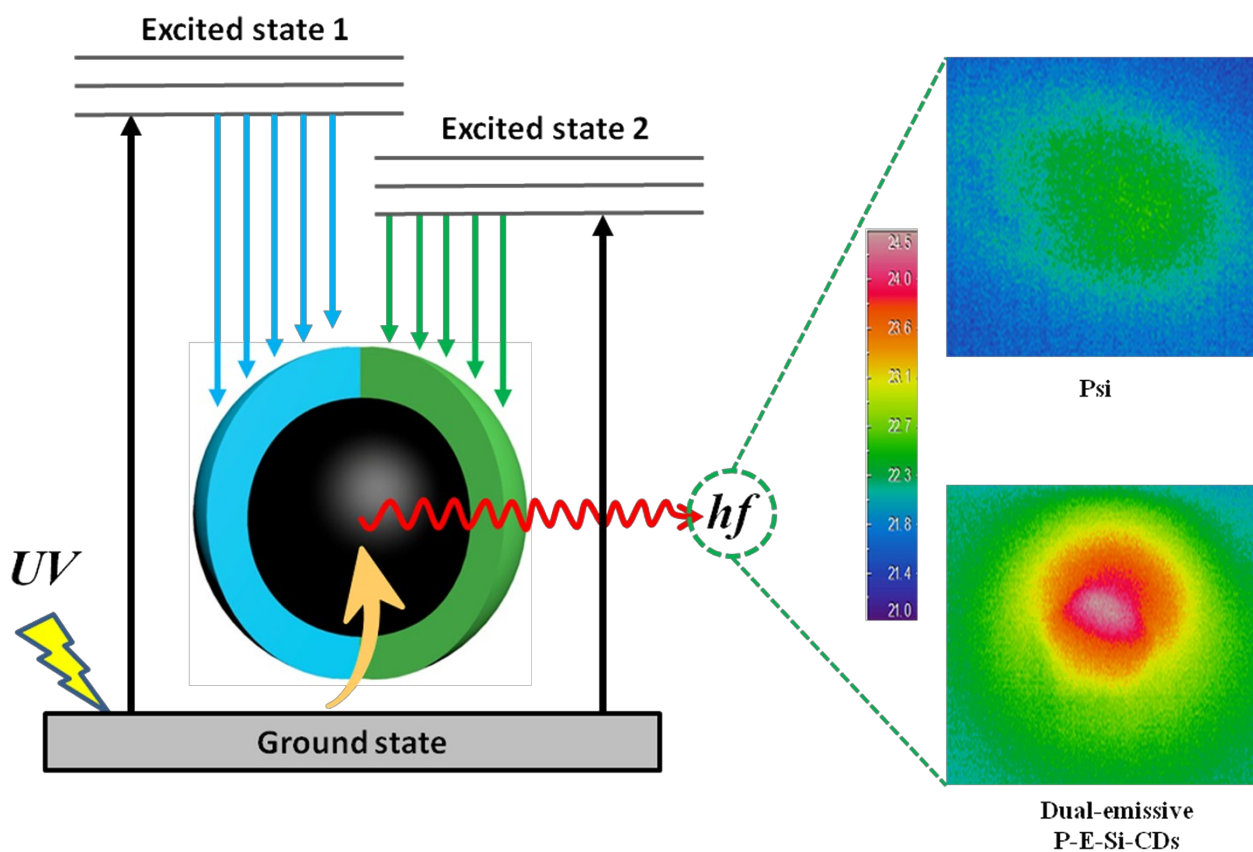

**Figure 7.** The mechanism illustration of P-E-Si-CDs with the function of UV absorption (Left), and the infrared images (right) of Psi and dual-fluorescence P-E-Si-CDs.

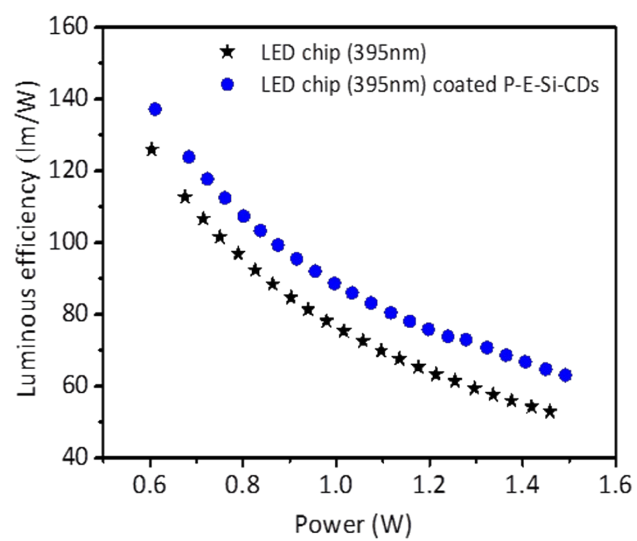

**Figure S8.** Luminous efficiency of warm WLED based on UV-emissive LED chip ( $\lambda_{\text{peak}}$ : 395 nm) and dual-fluorescence P-E-Si-CDs along with varying electric power.
